# Supplementary material
Source: PubMed Central journal article supplement (PMC7087075)
Supplement: 705_2017_3245_MOESM1_ESM.pdf [file 705_2017_3245_MOESM1_ESM.pdf]

Table S1 List of primers used in this study

| Primer name | Nucleotide sequences (5'-3') | Location(nt) | Tm(°C) | Length (bp) |
|-------------|------------------------------|--------------|--------|-------------|
| PIV5-0-F    | ACCAAGGGGAAAATGAAGT          | 1-519        | 52     | 519         |
| PIV5-0-R    | CTCATACCTGAACGAGCATT         |              |        |             |
| PIV5-1-F    | GATCATTCCGCTTAATCCC          | 480-928      | 54     | 449         |
| PIV5-1-R    | CTTTCCAACATCCCCTACC          |              |        |             |
| PIV5-2-F    | GTATTATGCTATGGTAGGGGATG      | 898-1628     | 55.5   | 731         |
| PIV5-2-R    | CAACTGCTGCGTTCTGGAT          |              |        |             |
| PIV5-3-F    | ACCCACGATGATGAGATGC          | 1508-2447    | 58     | 940         |
| PIV5-3-R    | CAGCGGTGATTGGAGAACA          |              |        |             |
| PIV5-4-F    | TGGGAGATGAAGTCAAGGTC         | 2388-4450    | 54.7   | 2063        |
| PIV5-4-R    | CAAGCTGGTGATTCCAGTTAT        |              |        |             |
| PIV5-5-F    | CTCGTAAGCACTGATCGTAG         | 4337-6235    | 53.3   | 1899        |
| PIV5-5-R    | AGTTTCGGTCCTATCGTTT          |              |        |             |
| PIV5-6-F    | CAGCATTCCACCACTCACG          | 6118-7516    | 54.7   | 1399        |
| PIV5-6-R    | TTAATCACGCCGCCATAT           |              |        |             |
| PIV5-7-F    | TATTTAGGTTGGGTACTCTTTCC      | 7472-9061    | 54.7   | 1590        |
| PIV5-7-R    | GGTTATGATGATTATGCCTTCTC      |              |        |             |
| PIV5-8-F    | TGGACTGACAGGTCGTGGGA         | 8824-10558   | 58.5   | 1735        |
| PIV5-8-R    | TGCTGGTGGGTTGAAGGGA          |              |        |             |
| PIV5-9-F    | GCAAGTCAATCAGCGAGAT          | 10339-12014  | 53.3   | 1676        |
| PIV5-9-R    | CGATACCAGATGGCAAGAA          |              |        |             |
| PIV5-10-F   | CACTCTTGGGTGGGAGAAA          | 11865-13746  | 54.7   | 1882        |
| PIV5-10-R   | CCTAATGGGCGTAAGGTATG         |              |        |             |
| PIV5-11-F   | GCACCATACCTTACGCCCATTA       | 13723-15246  | 54     | 1524        |
| PIV5-11-R   | ACCAAGGGGAAAACCAAGATTAATC    |              |        |             |
