# Supplementary material
Source: PubMed Central journal article supplement (PMC7087075)
Supplement: 705_2017_3245_MOESM2_ESM.pdf [file 705_2017_3245_MOESM2_ESM.pdf]

Monday, December 05, 2016 09:40 AM

Percent Identity

Divergence

|    | 1    | 2    | 3    | 4    | 5    | 6    | 7    | 8    | 9    | 10   | 11   | 12   | 13   | 14   | 15   | 16   | 17   | 18   | 19   | 20   | 21   | 22   | 23   | 24    | 25   | 26   | 27   | 28    | 29   | 30   |    |
|----|------|------|------|------|------|------|------|------|------|------|------|------|------|------|------|------|------|------|------|------|------|------|------|-------|------|------|------|-------|------|------|----|
| 1  | █    | 97.4 | 97.4 | 95.7 | 97.1 | 96.4 | 96.4 | 96.3 | 99.7 | 96.3 | 97.5 | 57.4 | 57.3 | 52.2 | 52.0 | 96.2 | 51.9 | 96.2 | 96.2 | 53.7 | 53.9 | 51.9 | 97.0 | 96.2  | 97.1 | 58.0 | 96.8 | 96.8  | 97.2 | 96.9 | 1  |
| 2  | 2.7  | █    | 98.8 | 97.7 | 99.1 | 98.3 | 98.2 | 98.4 | 97.3 | 98.2 | 98.8 | 57.5 | 57.4 | 52.2 | 52.1 | 98.2 | 52.1 | 98.2 | 98.2 | 53.7 | 53.8 | 52.1 | 99.0 | 98.2  | 99.1 | 58.1 | 98.9 | 98.9  | 99.8 | 98.8 | 2  |
| 3  | 2.6  | 1.2  | █    | 97.0 | 98.4 | 97.6 | 97.6 | 97.7 | 97.4 | 97.6 | 99.9 | 57.5 | 57.5 | 52.3 | 52.2 | 97.6 | 52.1 | 97.5 | 97.6 | 53.7 | 53.9 | 52.2 | 98.3 | 97.6  | 98.4 | 58.3 | 98.2 | 98.2  | 98.6 | 98.2 | 3  |
| 4  | 4.4  | 2.4  | 3.1  | █    | 97.7 | 96.9 | 96.9 | 97.2 | 95.7 | 98.3 | 97.0 | 57.4 | 57.2 | 52.0 | 51.9 | 98.3 | 52.2 | 98.3 | 98.3 | 53.6 | 53.7 | 52.1 | 97.6 | 98.3  | 97.7 | 58.0 | 98.1 | 98.1  | 97.5 | 97.5 | 4  |
| 5  | 2.9  | 0.9  | 1.6  | 2.3  | █    | 98.4 | 98.4 | 98.4 | 97.1 | 98.3 | 98.4 | 57.5 | 57.3 | 52.1 | 52.0 | 98.2 | 52.2 | 98.2 | 98.2 | 53.7 | 53.8 | 52.1 | 99.8 | 98.2  | 99.8 | 58.1 | 98.9 | 98.9  | 99.0 | 99.6 | 5  |
| 6  | 3.7  | 1.7  | 2.4  | 3.2  | 1.6  | █    | 99.9 | 97.6 | 96.4 | 97.4 | 97.6 | 57.4 | 57.3 | 52.1 | 52.1 | 97.4 | 52.1 | 97.4 | 97.4 | 53.8 | 53.9 | 52.1 | 98.3 | 97.4  | 98.4 | 58.1 | 98.0 | 98.1  | 98.1 | 98.2 | 6  |
| 7  | 3.7  | 1.8  | 2.5  | 3.2  | 1.6  | 0.1  | █    | 97.6 | 96.4 | 97.4 | 97.6 | 57.4 | 57.3 | 52.2 | 52.1 | 97.3 | 52.1 | 97.3 | 97.3 | 53.7 | 53.9 | 52.0 | 98.3 | 97.3  | 98.4 | 58.1 | 98.0 | 98.0  | 98.1 | 98.1 | 7  |
| 8  | 3.8  | 1.7  | 2.4  | 2.8  | 1.6  | 2.4  | 2.5  | █    | 96.3 | 97.7 | 97.7 | 57.6 | 57.4 | 52.1 | 52.0 | 97.7 | 52.2 | 97.7 | 97.7 | 53.7 | 53.8 | 52.1 | 98.3 | 97.7  | 98.3 | 58.2 | 98.4 | 98.4  | 98.2 | 98.1 | 8  |
| 9  | 0.3  | 2.7  | 2.6  | 4.5  | 3.0  | 3.7  | 3.8  | 3.8  | █    | 96.2 | 97.5 | 57.4 | 57.3 | 52.2 | 52.1 | 96.2 | 51.9 | 96.2 | 96.2 | 53.7 | 53.8 | 52.0 | 97.0 | 96.2  | 97.1 | 58.0 | 96.7 | 96.8  | 97.2 | 96.8 | 9  |
| 10 | 3.9  | 1.8  | 2.4  | 1.7  | 1.8  | 2.6  | 2.7  | 2.3  | 3.9  | █    | 97.6 | 57.6 | 57.5 | 52.2 | 52.0 | 99.9 | 52.3 | 99.9 | 99.9 | 53.6 | 53.8 | 52.2 | 98.1 | 99.9  | 98.2 | 58.0 | 98.6 | 98.6  | 98.1 | 98.0 | 10 |
| 11 | 2.5  | 1.2  | 0.1  | 3.0  | 1.6  | 2.4  | 2.5  | 2.3  | 2.6  | 2.4  | █    | 57.5 | 57.5 | 52.3 | 52.2 | 97.6 | 52.1 | 97.6 | 97.6 | 53.7 | 53.9 | 52.2 | 98.3 | 97.6  | 98.4 | 58.3 | 98.2 | 98.2  | 98.6 | 98.2 | 11 |
| 12 | 63.4 | 63.1 | 63.0 | 63.3 | 63.2 | 63.4 | 63.4 | 62.9 | 63.3 | 62.8 | 63.1 | █    | 97.4 | 50.5 | 50.6 | 57.6 | 50.8 | 57.6 | 57.6 | 52.6 | 52.5 | 50.0 | 57.5 | 57.6  | 57.5 | 66.5 | 57.5 | 57.5  | 57.5 | 57.4 | 12 |
| 13 | 63.5 | 63.4 | 63.2 | 63.8 | 63.5 | 63.7 | 63.7 | 63.3 | 63.5 | 63.1 | 63.2 | 2.6  | █    | 50.8 | 50.9 | 57.5 | 50.7 | 57.5 | 57.5 | 52.7 | 52.6 | 49.9 | 57.4 | 57.5  | 57.3 | 66.3 | 57.4 | 57.4  | 57.3 | 57.3 | 13 |
| 14 | 76.6 | 76.5 | 76.3 | 77.0 | 76.8 | 76.8 | 76.7 | 76.8 | 76.6 | 76.6 | 76.3 | 81.2 | 80.3 | █    | 87.5 | 52.2 | 50.1 | 52.2 | 52.2 | 51.1 | 51.4 | 50.1 | 52.1 | 52.2  | 52.1 | 50.0 | 52.2 | 52.2  | 52.2 | 52.1 | 14 |
| 15 | 77.3 | 76.9 | 76.7 | 77.4 | 77.2 | 76.9 | 76.9 | 77.3 | 77.1 | 77.1 | 76.8 | 81.1 | 80.2 | 14.0 | █    | 52.0 | 50.2 | 52.0 | 52.1 | 51.2 | 51.4 | 50.1 | 52.0 | 52.0  | 52.0 | 50.0 | 52.0 | 52.0  | 52.1 | 52.0 | 15 |
| 16 | 3.9  | 1.8  | 2.5  | 1.8  | 1.8  | 2.7  | 2.8  | 2.4  | 4.0  | 0.1  | 2.5  | 62.9 | 63.2 | 76.7 | 77.2 | █    | 52.2 | 99.8 | 99.9 | 53.6 | 53.8 | 52.2 | 98.1 | 100.0 | 98.2 | 58.0 | 98.5 | 98.6  | 98.0 | 97.9 | 16 |
| 17 | 77.4 | 76.8 | 76.8 | 76.6 | 76.7 | 76.9 | 76.9 | 76.7 | 77.4 | 76.5 | 76.8 | 80.6 | 81.0 | 82.9 | 82.5 | 76.6 | █    | 52.3 | 52.2 | 54.9 | 54.9 | 57.9 | 52.1 | 52.2  | 52.1 | 51.3 | 52.2 | 52.2  | 52.1 | 52.1 | 17 |
| 18 | 3.9  | 1.9  | 2.5  | 1.8  | 1.8  | 2.7  | 2.7  | 2.4  | 3.9  | 0.1  | 2.5  | 62.9 | 63.2 | 76.6 | 77.2 | 0.2  | 76.5 | █    | 99.9 | 53.6 | 53.8 | 52.2 | 98.1 | 99.9  | 98.2 | 58.0 | 98.5 | 98.6  | 98.0 | 97.9 | 18 |
| 19 | 3.9  | 1.8  | 2.5  | 1.8  | 1.8  | 2.7  | 2.8  | 2.4  | 3.9  | 0.1  | 2.5  | 62.8 | 63.1 | 76.6 | 77.1 | 0.1  | 76.5 | 0.1  | █    | 53.6 | 53.8 | 52.2 | 98.1 | 99.9  | 98.2 | 58.0 | 98.6 | 98.6  | 98.0 | 97.9 | 19 |
| 20 | 72.7 | 72.8 | 72.8 | 73.1 | 72.8 | 72.5 | 72.6 | 72.9 | 72.8 | 72.9 | 72.8 | 75.4 | 75.1 | 79.6 | 79.6 | 72.9 | 69.6 | 73.0 | 73.0 | █    | 93.6 | 53.9 | 53.6 | 53.6  | 53.7 | 52.6 | 53.6 | 53.6  | 53.7 | 53.6 | 20 |
| 21 | 72.3 | 72.5 | 72.3 | 72.6 | 72.4 | 72.2 | 72.2 | 72.5 | 72.4 | 72.4 | 72.3 | 75.8 | 75.6 | 78.8 | 78.9 | 72.4 | 69.6 | 72.5 | 72.5 | 6.8  | █    | 54.0 | 53.8 | 53.8  | 53.8 | 52.7 | 53.8 | 53.8  | 53.8 | 53.7 | 21 |
| 22 | 77.3 | 76.8 | 76.7 | 76.9 | 77.0 | 77.0 | 77.1 | 76.9 | 77.2 | 76.5 | 76.6 | 83.1 | 83.4 | 82.8 | 82.7 | 76.6 | 62.4 | 76.5 | 76.6 | 72.3 | 72.1 | █    | 52.0 | 52.2  | 52.0 | 50.5 | 52.1 | 52.1  | 52.1 | 52.0 | 22 |
| 23 | 3.0  | 1.0  | 1.7  | 2.4  | 0.2  | 1.7  | 1.8  | 1.8  | 3.1  | 1.9  | 1.7  | 63.2 | 63.4 | 76.8 | 77.2 | 1.9  | 76.8 | 2.0  | 1.9  | 72.9 | 72.5 | 77.1 | █    | 98.1  | 99.7 | 58.1 | 98.8 | 98.8  | 98.9 | 99.5 | 23 |
| 24 | 3.9  | 1.8  | 2.5  | 1.7  | 1.8  | 2.7  | 2.8  | 2.4  | 3.9  | 0.1  | 2.4  | 62.9 | 63.2 | 76.6 | 77.1 | 0.0  | 76.6 | 0.1  | 0.1  | 72.9 | 72.5 | 76.6 | 1.9  | █     | 98.2 | 58.0 | 98.5 | 98.6  | 98.0 | 97.9 | 24 |
| 25 | 3.0  | 0.9  | 1.6  | 2.4  | 0.2  | 1.6  | 1.7  | 1.7  | 3.0  | 1.8  | 1.6  | 63.2 | 63.5 | 76.8 | 77.3 | 1.8  | 76.8 | 1.9  | 1.9  | 72.9 | 72.5 | 77.1 | 0.3  | 1.8   | █    | 58.1 | 98.9 | 98.9  | 99.0 | 99.5 | 25 |
| 26 | 62.2 | 61.9 | 61.5 | 62.2 | 61.8 | 61.9 | 62.0 | 61.8 | 62.2 | 62.1 | 61.5 | 44.9 | 45.1 | 83.0 | 83.1 | 62.1 | 79.5 | 62.3 | 62.1 | 75.6 | 75.4 | 81.6 | 61.9 | 62.2  | 61.9 | █    | 58.1 | 58.1  | 58.1 | 58.0 | 26 |
| 27 | 3.3  | 1.1  | 1.9  | 2.0  | 1.1  | 2.0  | 2.0  | 1.6  | 3.3  | 1.4  | 1.8  | 63.2 | 63.4 | 76.6 | 77.2 | 1.5  | 76.8 | 1.5  | 1.5  | 73.0 | 72.5 | 77.0 | 1.2  | 1.5   | 1.1  | 61.9 | █    | 100.0 | 98.8 | 98.7 | 27 |
| 28 | 3.3  | 1.1  | 1.8  | 2.0  | 1.1  | 2.0  | 2.0  | 1.6  | 3.3  | 1.4  | 1.8  | 63.2 | 63.4 | 76.6 | 77.2 | 1.5  | 76.7 | 1.5  | 1.4  | 73.0 | 72.5 | 77.0 | 1.2  | 1.4   | 1.1  | 62.0 | 0.0  | █     | 98.8 | 98.7 | 28 |
| 29 | 2.8  | 0.2  | 1.4  | 2.5  | 1.0  | 1.9  | 1.9  | 1.8  | 2.9  | 1.9  | 1.4  | 63.2 | 63.6 | 76.5 | 77.0 | 2.0  | 76.8 | 2.0  | 2.0  | 72.7 | 72.4 | 76.8 | 1.1  | 2.0   | 1.0  | 62.0 | 1.3  | 1.2   | █    | 98.7 | 29 |
| 30 | 3.2  | 1.2  | 1.9  | 2.6  | 0.4  | 1.8  | 1.9  | 1.9  | 3.3  | 2.0  | 1.9  | 63.4 | 63.7 | 76.9 | 77.2 | 2.1  | 77.0 | 2.1  | 2.1  | 73.1 | 72.7 | 77.2 | 0.5  | 2.1   | 0.5  | 62.1 | 1.4  | 1.3   | 1.3  | █    | 30 |
|    | 1    | 2    | 3    | 4    | 5    | 6    | 7    | 8    | 9    | 10   | 11   | 12   | 13   | 14   | 15   | 16   | 17   | 18   | 19   | 20   | 21   | 22   | 23   | 24    | 25   | 26   | 27   | 28    | 29   | 30   |    |

- 08-1990-KC237063.seq
- 1168-1-KC237064.seq
- 78524-JQ743319.seq
- AGS-KX060176.seq
- CC-14-KP893891.seq
- CPI+JQ743321.seq
- CPI-JQ743320.seq
- Cryptovirus-AX586923.seq
- D277-KC237065.seq
- DEN-JQ743322.seq
- H221-JQ743323.seq
- HPIV2-AF533011.seq
- HPIV2-AF533012.seq
- HPIV4a-AB543336.seq
- HPIV4b-AB543337.seq
- LN-JQ743324.seq
- Mapuera virus-EF095490.seq
- MEL-JQ743325.seq
- MIL-JQ743326.seq
- Mumps-AY309060.seq
- Mumps-FJ211586.seq
- Porcine rubulavirus-BK005918.seq
- PV5-BC14-KM067467.seq
- RQ-JQ743327.seq
- SER-JQ743328.seq
- SV41-X64275.seq
- SV5-AF052755.seq
- W3A-JQ743318.seq
- ZJQ-221.seq
- KNU-11-KC852177.seq
