# Supplementary material
Source: PubMed Central journal article supplement (PMC7087075)

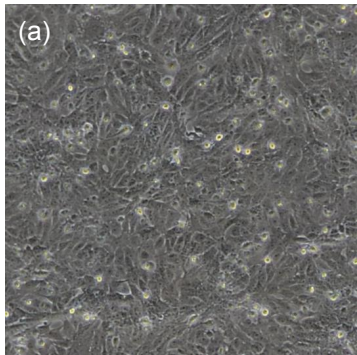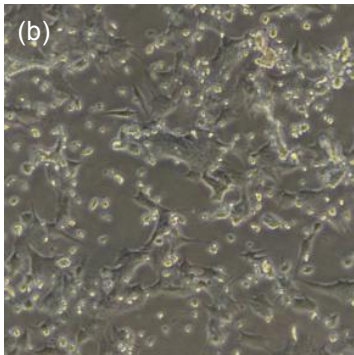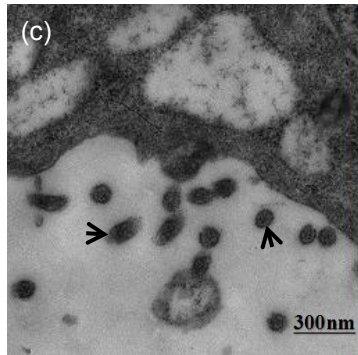

Supplement: 705_2017_3245_MOESM3_ESM.pdf [file 705_2017_3245_MOESM3_ESM.pdf]
